# Supplementary material for: Impact of Phosphate Availability on Membrane Lipid Content of the Model Strains, Streptomyces lividans and Streptomyces coelicolor
Source: Front Microbiol. 2021 Feb 22;12:623919. doi: 10.3389/fmicb.2021.623919 (PMC7937720; doi:10.3389/fmicb.2021.623919)
Supplement: Supplementary file 1 [file Table_1.xlsx]

## Sheet: Papier SCO0921-20
Table S1: List of primer used for qRT-PCR experiments
Reference gene	Gene name		Primer sequences
SCO2126	Glk	F	CAGCGCTCCACGGTCTACTT
		R	GTGATGCAGATGACGTTGC
SCO3795	AspS	F	CTGCTGATGATCTCGGGCTT
		R	CGAGCTGGTAGAACTCGCC
SCO3873	GyrA	F	GGCGACTCCTCCATCTACGA
		R	GACCATCTCCATCGACAGC
SCO3874	GyrB	F	TCGAGACCACCGACTACTCCTT
		R	TCTTGACCTCGTGCTTCTCG
SCO4654	RpoB	F	CTTCGAGCCTCCCAAGAACA
		R	TTGGTCATGAGCGGGAAGT
SCO5566	RecG (excluded)	F	TCTTCAACCGTCGACTGCAA
		R	TTCCAGGACTCCAGCTTCG
SCO5820	HrdB (excluded)	F	CTCAAGCAGATCGGCAAGGT
		R	TCCAGCAGGTGGTTCTTGG
Target gene	Gene name		Primer sequences
SCO0920		F	ACGTCTCCTGGCTCGACATC
		R	CCCGTTCGATGAACAGCAC
SCO0921		F	CTGTACGCGGAGAGCGAGTT
		R	GGTCATGTAGCGGGCTATGC
SCO1222		F	ATCAACCCGTGGATGAGCAC
		R	GAAGACCATGTCGGGCAGTC
SCO1223		F	AAGTGGGCCTACGACGTCAA
		R	TCGGTGGAGAAGCTCACGAT

## Sheet: Papier protéomique Aaron
Table S1: List of primer used for qRT-PCR experiments
Reference gene	Gene name		Primer sequences
SCO2126	Glk	F	CAGCGCTCCACGGTCTACTT
		R	GTGATGCAGATGACGTTGC
SCO3795	AspS	F	CTGCTGATGATCTCGGGCTT
		R	CGAGCTGGTAGAACTCGCC
SCO3873	GyrA	F	GGCGACTCCTCCATCTACGA
		R	GACCATCTCCATCGACAGC
SCO3874	GyrB	F	TCGAGACCACCGACTACTCCTT
		R	TCTTGACCTCGTGCTTCTCG
SCO4654	RpoB	F	CTTCGAGCCTCCCAAGAACA
		R	TTGGTCATGAGCGGGAAGT
SCO5566	RecG (excluded)	F	TCTTCAACCGTCGACTGCAA
		R	TTCCAGGACTCCAGCTTCG
SCO5820	HrdB (excluded)	F	CTCAAGCAGATCGGCAAGGT
		R	TCCAGCAGGTGGTTCTTGG
Target gene	Gene name		Primer sequences
SCO2198	Glutamine synthetase I, GlnA	F	GTGAAGAACGTGGCCTGGAA
		R	CGTAGCCCTGCTCGTCGTAG
SCO2210	Glutamine synthetase	F	GCTCCGTTCCAAGACGAAGA
		R	GAGAAGACCGGCTTGAGCAC
SCO4139	PstB	F	CTGAAGGAGCGCTTCACGAT
		R	CCAGGTTGAAGAACGCCGTA
SCO4141	PstC	F	CCAGAACATCGCCAGCAAGT
		R	CAGCAGGGTGATGACGAACA
SCO4142	PstS	F	AGCAACATCAAGTGCGACGA
		R	GGAACCGGTCGGGTTGTAGT
SCO4144	mutT1	F	GTACGCGTCCCGTCTGGAG
		R	GCCCACCGTGAGGTTGC
SCO4145	ppk	F	AGTCCGCCAACATCAAGTGG
		R	GCTTGCAGTGGGTCTTCAGG
SCO4159	GlnR	F	ACGTACTCCGCGAAGCTGAA
		R	GTGCCGCCGAAGTAGTCGTA
SCO4228	PhoU	F	ACGCGACCATCCTGGAGAT
		R	GGTCGACGTCCTTGGTGATG
SCO4229	PhoP	F	GACGGAGAGATACGGCAGGTC
		R	CTCACGTTGGCGACGAAGTC
SCO4230	PhoR	F	GTGCTCCTCGACCTGATGCT
		R	GTCGATCTCGCTGTCCTTGG

## Sheet: Feuil1
Oligos	Reference gene		Primer sequences
0218-0219-SCO5820	SCO5820	F	CTCAAGCAGATCGGCAAGGT
		R	TCCAGCAGGTGGTTCTTGG
0246-0247-SCO3795	SCO3795	F	CTGCTGATGATCTCGGGCTT
		R	CGAGCTGGTAGAACTCGCC
0254-0255-SCO3873	SCO3873	F	GGCGACTCCTCCATCTACGA
		R	GACCATCTCCATCGACAGC
0262-0263-SCO5566	SCO5566	F	TCTTCAACCGTCGACTGCAA
		R	TTCCAGGACTCCAGCTTCG
0270-0271-SCO4654	SCO4654	F	CTTCGAGCCTCCCAAGAACA
		R	TTGGTCATGAGCGGGAAGT
0274-0275-SCO3874	SCO3874	F	TCGAGACCACCGACTACTCCTT
		R	TCTTGACCTCGTGCTTCTCG
0284-0285-SCO2126	SCO2126	F	CAGCGCTCCACGGTCTACTT
		R	GTGATGCAGATGACGTTGC
Oligos	Target gene		Primer sequences
0224-0225-SCO2389	SCO2389	F
		R
0290-0291-SCO0920	SCO0920	F	ACGTCTCCTGGCTCGACATC
		R	CCCGTTCGATGAACAGCAC
1373-1374-SCO0324	SCO0324	F	CACCGGCTCTACACGGTCAC
		R	GCGTCCTTGACGGTCAGTTC
1381-1382-SCO0498	SCO0498	F	CATGCAGGTGTCCTTCCTCAA
		R	CGGGAAGAGGTTCTTGTGGTT
1385-1386-SCO0877	SCO0877	F	GTGCTCGACGCGTTGACTT
		R	TGAGCGGCGATCTCCTTACT
1393-1394-SCO0921	SCO0921	F	CTGTACGCGGAGAGCGAGTT
		R	GGTCATGTAGCGGGCTATGC
1399-1400-SCO1182	SCO1182	F	ATTCTGCTCGAACACGACCTG
		R	CACCACACCACGAGCAACTC
1405-1406-SCO1222	SCO1222	F	ATCAACCCGTGGATGAGCAC
		R	GAAGACCATGTCGGGCAGTC
1407-1408-SCO1223	SCO1223	F	AAGTGGGCCTACGACGTCAA
		R	TCGGTGGAGAAGCTCACGAT
1411-1412-SCO1613	SCO1613	F	TCCTGCCACATCCACCTCTC
		R	GGGCGTAGAGGAGGGAGAAC
1417-1418-SCO1646	SCO1646	F	AGGCATCGGAGGACCTCAAG
		R	AGTACATCGTCGATCTCGTCCAA
1421-1422-SCO1753	SCO1753	F	ACTGCTCCTGCTGAACGTCAC
		R	GGTGTGACCGCTCGGAAAT
1425-1426-SCO1845	SCO1845	F	TAACCGCACTCGCGTTTGAT
		R	AGAGGAAGGCGCCTACAAGGT
1429-1430-SCO1947	SCO1947	F	GAACTTCGGCATCGTCAAGG
		R	TGGTCGGGATGATGTTCTCC
1431-1432-SCO2014	SCO2014	F	AAGGGCCCGTACTCCTTGAA
		R	GTAGGTGGTGCCGCAGATGT
1435-1436-SCO2198	SCO2198	F	GTGAAGAACGTGGCCTGGAA
		R	CGTAGCCCTGCTCGTCGTAG
1441-1442-SCO2210	SCO2210	F	GCTCCGTTCCAAGACGAAGA
		R	GAGAAGACCGGCTTGAGCAC
1443-1444-SCO2213	SCO2213	F	CGCGAACTCGACCTGACCTA
		R	GTGTCCGTAGCCCCACACC
1447-1448-SCO2241	SCO2241	F	GCAACGCGTTCTACGAGTCC
		R	CCCAGATGCGCTTGTAGGAGT
1453-1454-SCO2385	SCO2385	F	CTGGCCTGCAACGAGGAG
		R	CAGGTGACGATCTCGGTGTG
1457-1458-SCO2386	SCO2386	F	CTGAAGCGGCTGGAGCAGT
		R	GTGAACGCGGCGATGC
1459-1460-SCO2387	SCO2387	F	CCTGTGCATGGAGACGTTCA
		R	CTTCAGGGCCAGCGTCTTC
1463-1464-SCO2390	SCO2390	F	GTGACATCGCCGAGCTGAA
		R	GACCGGTCATCGACTTGGTG
1467-1468-SCO2782	SCO2782	F	TGCAGGAACGTATCCCCAAC
		R	CAGCGTCATCCACAGCTTGA
1471-1472-SCO2925	SCO2925	F	ATGGACCGCATCCTGGAGAT
		R	CGGGTAGTAGAGGCCGTGTTC
1477-1478-SCO3096	SCO3096	F	AACCAGATCGGTTCGCTGAC
		R	CGGTGGGACATCATGCACTT
1485-1486-SCO3222	SCO3222	F	GACTTCGGTTACCGCAACTACAA
		R	TGTTGCAGGCCGTGTTCTT
1491-1492-SCO3225	SCO3225	F	ACCAGGCCAGGATGAAGGAG
		R	AGGGCCATCACGCTCAGTT
1493-1494-SCO3226	SCO3226	F	TCGTCGTCCTCACCACCTTC
		R	GACGCCTTGAGCAGGAACC
1499-1500-SCO3563	SCO3563	F	TGGGTCACCGGACACTCGTA
		R	AGAGGATCGTCACGCCGTACT
1503-1504-SCO4138	SCO4138	F	GGTTCGGCGTTCATCTTCC
		R	CCACCCCATGATGATGTTCTTC
1505-1506-SCO4139	SCO4139	F	CTGAAGGAGCGCTTCACGAT
		R	CCAGGTTGAAGAACGCCGTA
1511-1512-SCO4141	SCO4141	F	CCAGAACATCGCCAGCAAGT
		R	CAGCAGGGTGATGACGAACA
1513-1514-SCO4142	SCO4142	F	AGCAACATCAAGTGCGACGA
		R	GGAACCGGTCGGGTTGTAGT
1521-1522-SCO4145	SCO4145	F	AGTCCGCCAACATCAAGTGG
		R	GCTTGCAGTGGGTCTTCAGG
1525-1526-SCO4159	SCO4159	F	ACGTACTCCGCGAAGCTGAA
		R	GTGCCGCCGAAGTAGTCGTA
1529-1530-SCO4209	SCO4209	F	AGTTCTCCGACCCGCGTTAC
		R	GTCGAACCAGTACGGGAGCA
1535-1536-SCO4228	SCO4228	F	ACGCGACCATCCTGGAGAT
		R	GGTCGACGTCCTTGGTGATG
1537-1538-SCO4229	SCO4229	F	GACGGAGAGATACGGCAGGTC
		R	CTCACGTTGGCGACGAAGTC
1541-1542-SCO4230	SCO4230	F	GTGCTCCTCGACCTGATGCT
		R	GTCGATCTCGCTGTCCTTGG
1549-1550-SCO4470	SCO4470	F	ATCGAGGCGGAGAACGTCTT
		R	TGACCACGTGCTTCCAGTTG
1553-1554-SCO5231	SCO5231	F	ATCGAGACCACCCACCTCAG
		R	GCGGTGTAGAGGGACGTGTACT
1557-1558-SCO5425	SCO5425	F	CGTGGTCTCGGACGTGAACT
		R	GTCCGGCTTGGTCTTGATGA
1563-1564-SCO5529	SCO5529	F	ACCACGCTGGACGAGAACC
		R	CGGTAGCCGTCGAAGAAGTG
1565-1566-SCO5583	SCO5583	F	GTCGAGGGCCTCTTCTACGG
		R	ATGCCGATCGTCTTGTCCAG
1569-1570-SCO5584	SCO5584	F	GGCTCGACGAGATCAAGGAG
		R	CGGTAGACCTCGGTGTGTCC
1579-1580-SCO7040	SCO7040	F	ACCGTCGACGAGGACAACAG
		R	GATGAGGATGGCGTCCTTGA
1581-1582-SCO7173	SCO7173	F	CTGAGAGCGCACAGCCTCTT
		R	TAGTGCGGGTCGGTCTTGTC
1585-1586-SCO7511	SCO7511	F	GCTGGTCTCCTCCGACATCA
		R	CACCTTGATGTGGCGTCCTT
1593-1594-SCO7638	SCO7638	F	CAGCCCCTCTACCGTTACCTC
		R	ACCGGCACGATCATGAACTC
1675-1676-SCO4143	SCO4143	F	CCCGAAGTACGACGACTGGT
		R	GAGGTAGCGCACGGTGGTC
1681-1682-SCO4144	SCO4144	F	GTACGCGTCCCGTCTGGAG
		R	GCCCACCGTGAGGTTGC
1691-1692-SCO4145+4144	SCO4145+4144	F	CTGCGCAACATCCAGGAGAT
		R	GGGGTTTCCGGTGGAAAGT
1695-1696-SCO4144+4143	SCO4144+4143	F	CAGCGGCATGAGGTGGAG
		R	TCGTCTGCGGGGCTCA
1699-1700-SCO0452	SCO0452	F	ACGAGCAGGTCGGGGACT
		R	TTCTCGCCGAAGAACACCAC
1703-1704-SCO1102	SCO1102	F	GCTGCAACAGGCCCTCAA
		R	CACGAACGTCGCGGTCA
1705-1706-SCO3219	SCO3219	F	TGGCCCTCTCGCTCTGGTA
		R	GGTGGAAGCGCAGGATCAG
1711-1712-SCO4394	SCO4394	F	CTGGGAGCACGTGATGAGC
		R	CATCCCCTCGTCCAGGAAC
1713-1714-SCO6962	SCO6962	F	GATCGCCCGGGTGAAGAC
		R	GTCGTCGGCCAGGAAGGT
1717-1718-SCO7512	SCO7512	F	CACCACGCACTGGCACTACA
		R	AGGATGTGCAGGCACAGGTC
1723-1724-SCO7639	SCO7639	F	GACGGCGCCATGACCA
		R	ACAGCTCGACCAGCGACTTG
