# Supplementary material for: Impact of Phosphate Availability on Membrane Lipid Content of the Model Strains, Streptomyces lividans and Streptomyces coelicolor
Source: Front Microbiol. 2021 Feb 22;12:623919. doi: 10.3389/fmicb.2021.623919 (PMC7937720; doi:10.3389/fmicb.2021.623919)
Supplement: Supplementary file 3 [file Table_3.xlsx]

## Sheet: Papier SCO0921-20
Table S3: List of primer used for constructions of deletion or over-expression
Deletion of the sco0921-20 operon
Construction of the plasmid
Target gene	Region		Primer sequences
sco0921-20 operon	Upstream	F	CCGGCGAGGAGTTCAACC
		R	CGGTCAGTACGCCGGTCA
	Downstream	F	CGCTGCTCACCTCCCTGT
		R	CCGGGCATTCTTCGTCTCA
Verification of the disruption of sco0921-20 operon
Target gene	Region		Primer sequences
sco0921-20 operon	Upstream	F	GTTCTGGCGGCGCATCAAGG
		R	CGACGTGGCAGGATCGAACG
	Apramycin resistance cassette	F	TCGTCATGTGCAGTACAG
		R	GGCACAAACCTCACAAAG
	Downstream	F	GTCAACTGGGCCGAGATCCG
		R	GCCGACCACGTGATCGACCTG
Over-expression of the sco0921-20 operon, sco0921 or sco0920 gene alone
Construction of the plasmid
Target gene			Primer sequences
sco0921-20 operon		F	ATGACCGGCGTACTGACCGCTG
		R	GTGCCTGCCTTCCGGTTGTCC
sco0921		F	ATGACCGGCGTACTGACCGCTG
		R	AGCACGACGGCGATCCC
sco0920		F	ATGGGCGGCTGGCTGCCCCTG
		R	GTGCCTGCCTTCCGGTTGTCC
Verification of the integration of sco0921-20 operon, sco0921 or sco0920 gene alone
Target gene	Site		Primer sequences
sco0921-20 operon, sco0921 or sco0920 alone	attL	F	AGCACCACCACGTCGAGG
		R	TCGGGATCGCCAATCTCTAC
	attR	F	TTTGAGGACCAGGGCTGG
		R	ATAGCCCACTATGTCCGGTCTG
